# Supplementary material for: Interleukin-12 elicits a non-canonical response in B16 melanoma cells to enhance survival
Source: PubMed Central journal article supplement (PMC7249691; doi:10.1186/s12964-020-00547-4), 2020-05-25

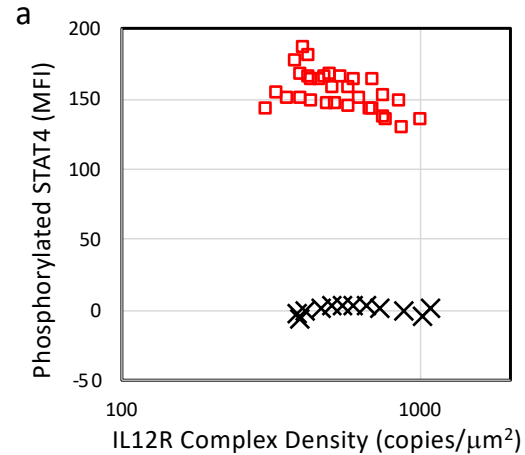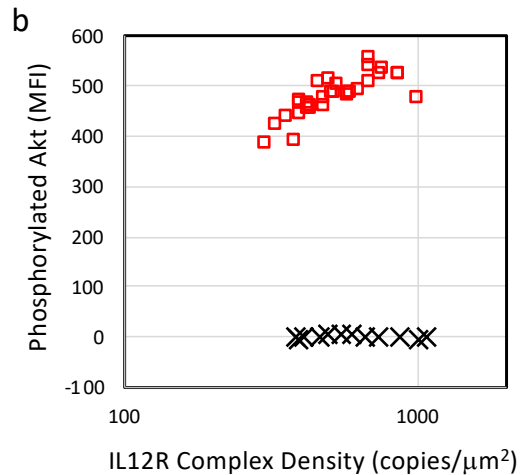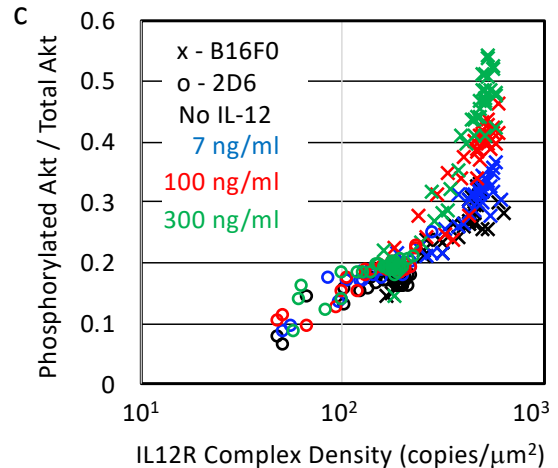

Supplement: 12964_2020_547_MOESM5_ESM.pdf [file 12964_2020_547_MOESM5_ESM.pdf]
